# Supplementary material
Source: PubMed Central journal article supplement (PMC2724867)
Supplement: NIHMS130714-supplement-01.pdf [file NIHMS130714-supplement-01.pdf]

Supplementary figure 1. Detailed mass spectrometry analysis for CaMKII gamma C-1 autophosphorylation sites. The results shown are the result of a single microcapillary reverse-phase HPLC run, directly coupled to the nano-electrospray ionization source of an ion trap mass spectrometer. This instrument configuration is capable of acquiring individual sequence (MS/MS) spectra on-line at high sensitivity (<1 femtomole) for multiple peptides in the chromatographic run. These MS/MS spectra, (also referred to as CID, sequence or fragmentation spectra), are then correlated with known sequences using the algorithm Sequest developed at the Univ. of Washington and programs developed in by [17]. MS/MS peptide sequences are then reviewed for consensus with known proteins and the results manually confirmed for fidelity.

Supplementary figure 2. Sites of autophosphorylation. Sites of autophosphorylation of CaMKII gamma C-1 in the presence of  $\text{Ca}^{2+}/\text{CaM}$  as determined by mass spectrometry are represented in blue with the residue number at the top. Residues described as phospho-sites in the literature and not found to be autophosphorylated here are also numbered.

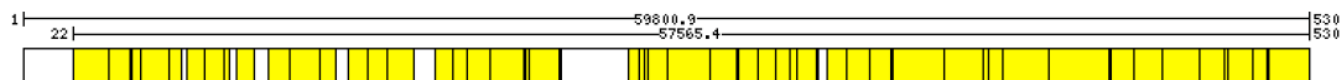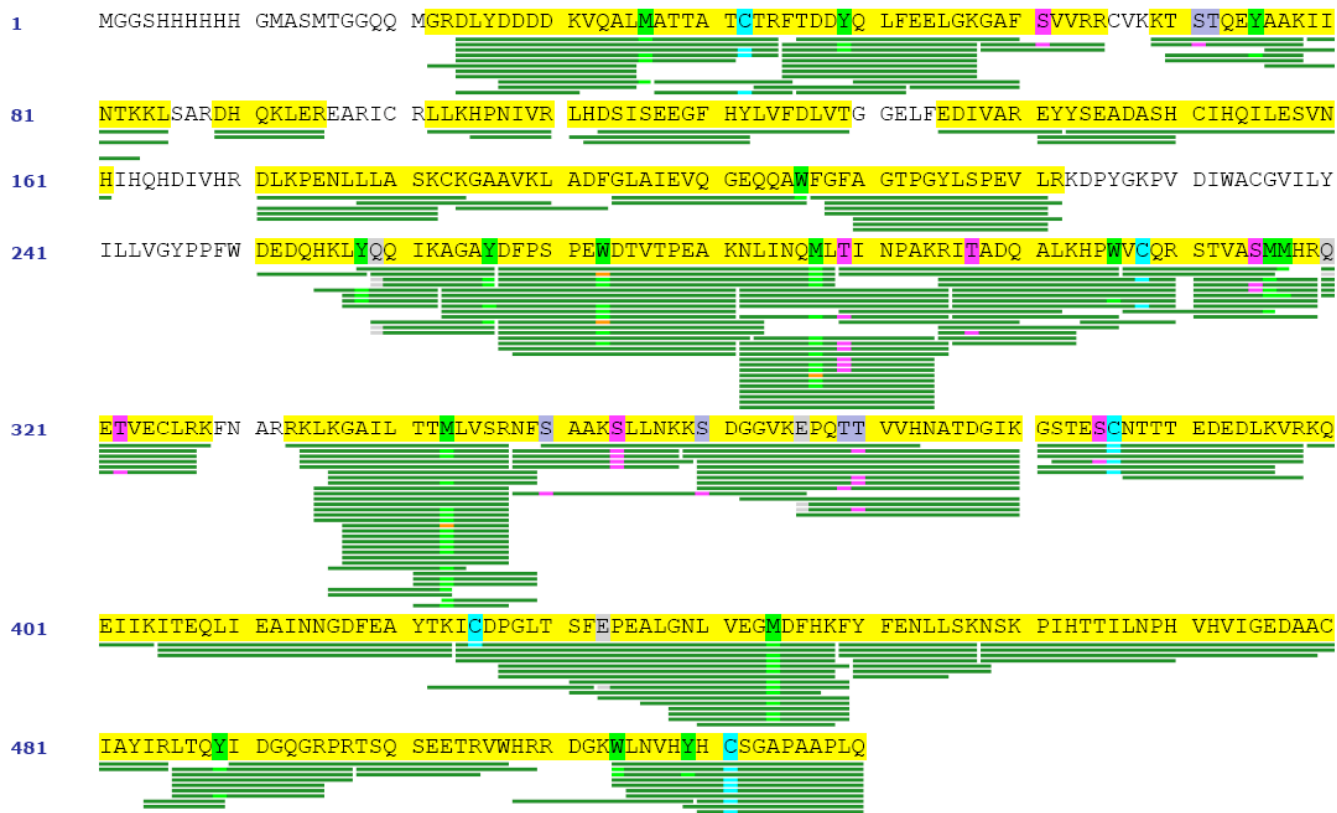

**Legend:**

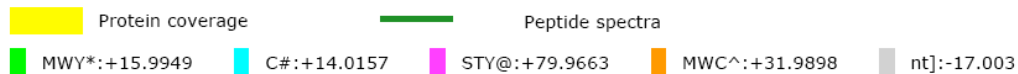

# Supplementary figure 1

MATTATCTRFTDDYQLFEELGKGAF<sup>26</sup>S<sup>26</sup>VVRRRCVKKTSTQEYAA  
KIINTKKLSARDHQKLEREARICRLLKHPNIVRLHDSISEEGFHY  
LVFDLVTGGELFEDIVAREYYSEADASHCIHQILES<sup>254</sup>VNHHIQHDI  
VHRDLKPENLLLASKCKGAAVKLADFG<sup>262</sup>LAI<sup>280</sup>EVQGEQQA<sup>287</sup>WFGF  
AGTPGYLSPEVLRKDPYGKPV<sup>262</sup>DIWACGVILYILLVGYPPFWDE  
DQHKLYQQIKAGAYDFPSPEWDTVTPEAKN<sup>254</sup>LINQML<sup>280</sup>TINPAKR  
IT<sup>262</sup>ADQALKHPWVCQRSTVA<sup>280</sup>S<sup>280</sup>MMHRQET<sup>287</sup>VECLRKFNARRK<sup>287</sup>KLK  
GAIL<sup>306</sup>TTML<sup>307</sup>VSRNFSA<sup>315</sup>AK<sup>319</sup>S<sup>319</sup>LLNKKSDGGVKEPQTTVVHNATDGI  
KGSTE<sup>350</sup>SCNTTTEDEDLKVRKQEIIKITEQLIEAINNGDFEAYTKIC  
DPGLTSFEPEALGNLVEGMD<sup>350</sup>FHKFYFENLLSKNSKPIHTTILNPH  
VHVIGEDAACIA<sup>350</sup>YIRLTQYIDGQGRPRTSQSEETR<sup>350</sup>VWHRRDGK  
WLVN<sup>350</sup>VHYHCSGAPAAPLQ

## Supplementary figure 2
